# Supplementary material for: Protease Inhibition Improves Healing of The Vaginal Wall after Obstetrical Injury: Results from a Preclinical Animal Model
Source: PubMed Central journal article supplement (PMC7156712; doi:10.1038/s41598-020-63031-6), 2020-04-14
Supplement: 41598_2020_63031_MOESM1_ESM.pdf [file 41598_2020_63031_MOESM1_ESM.pdf]

PROTEASE INHIBITION IMPROVES HEALING OF THE VAGINAL WALL AFTER OBSTETRICAL INJURY:  
RESULTS FROM A PRECLINICAL ANIMAL MODEL

Jennifer Hamner DO<sup>1</sup>, Maria Florian-Rodriguez MD<sup>2</sup>, Jesus Acevedo MS<sup>2</sup>, Haolin Shi<sup>2</sup>, and R Ann Word MD<sup>2</sup>

<sup>1</sup>Department of Obstetrics and Gynecology<sup>1</sup>  
Division of Female Pelvic Medicine and Reconstructive Surgery  
University of Texas Southwestern Medical Center, Dallas, Texas, USA

<sup>2</sup>Department of Obstetrics and Gynecology  
Cecil H and Ida Green Center for Reproductive Biological Sciences  
Division of Female Pelvic Medicine and Reconstructive Surgery  
University of Texas Southwestern Medical Center, Dallas, Texas, USA

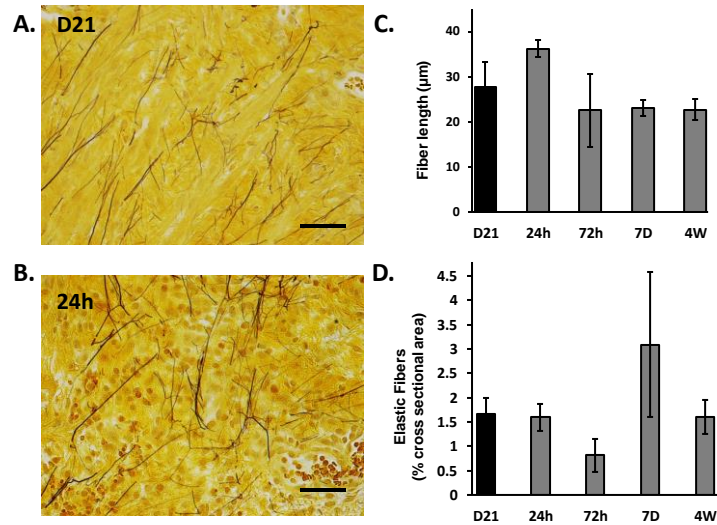

**Supplementary Figure 1. Elastic fiber morphology and quantification after normal vaginal delivery.** Hart's staining revealed long elastic fibers throughout the vaginal muscularis of the posterior vaginal wall in pregnant rats in late gestation (D21, **A**) which were similar 24h after delivery despite immune cell infiltration (**B**). (**C**) Vaginal elastic fiber length during pregnancy and postpartum. (**D**) Cross sectional area covered by elastic fibers in the vaginal muscularis during pregnancy and the postpartum time period. Results represent mean  $\pm$  SEM of 5 animals in each group. Bar, 50  $\mu$ m

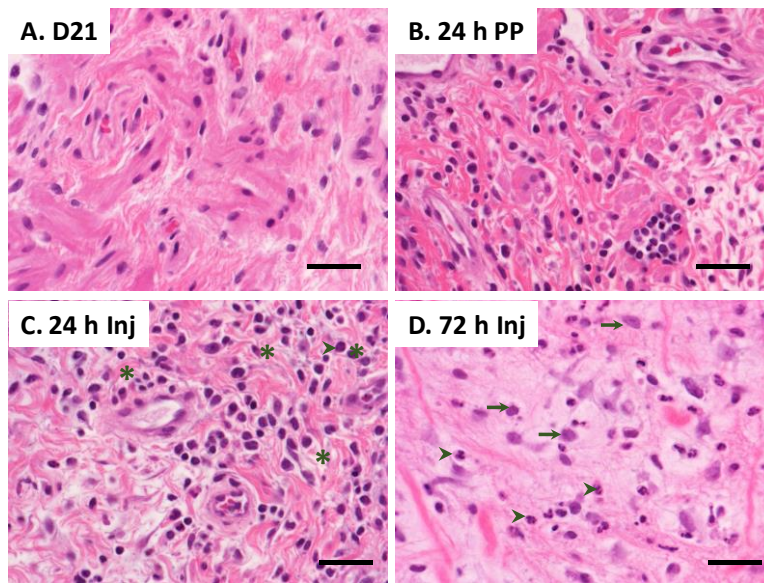

**Supplementary Figure 2. Effect of vaginal delivery with or without injury on immune cells in the parturient vagina.** H&E staining revealed few resident immune cells on D21 of pregnancy (**A**). After normal vaginal delivery (24h, **B**) monocytes and neutrophils were localized within blood vessels and infiltrated the muscularis. After injury (24h, **C**), monocytes and neutrophils (arrowhead) were abundant and surrounded by a pericellular halo (\*) and matrix degradation. By 3d (**D**), immune cells included neutrophils (arrowheads) and macrophages (arrows). Bar, 50  $\mu$ m

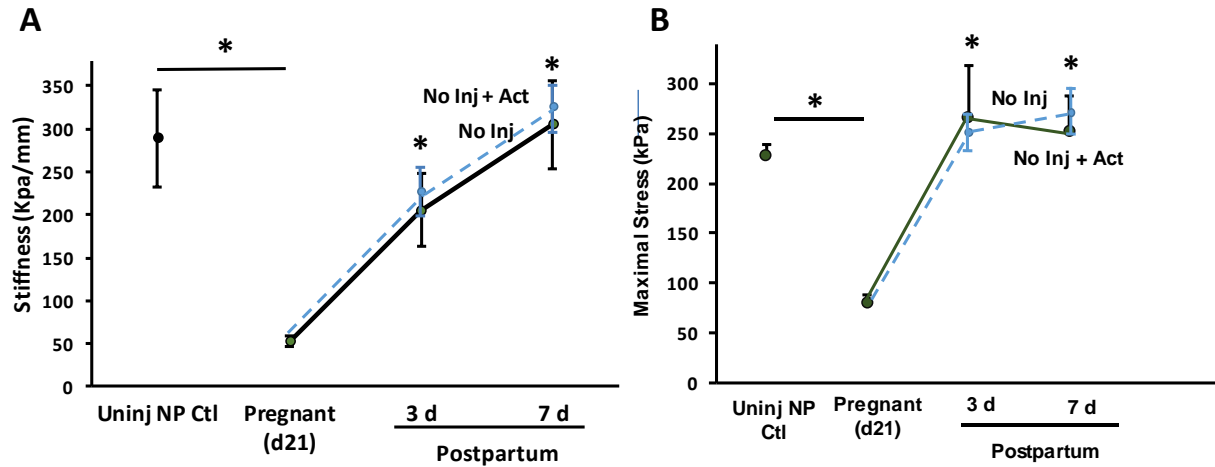

**Supplementary Figure 3. Effect of actinonin on biomechanical properties of the postpartum uninjured rat vaginal wall. (A)** Stiffness was quantified from the slope of the linear portion of stress-strain curve. Postpartum time points of 3 and 7d with or without actinonin (Act) are represented (no injury). **(B)** Maximal stress generating capacity in nonpregnant, pregnant, and postpartum animals without injury with or without actinonin. Data represent mean  $\pm$  SEM of nonpregnant (n=8), normal postpartum with (n = 4 per 3 D and 7 D time points, dashed line) or without actinonin (n = 8 per time point, solid line). \*, P < NP or P (d21). Actinonin alone had no effect on normal postpartum recovery
